# Supplementary material
Source: PubMed Central journal article supplement (PMC8279581)
Supplement: jci-131-150175-s007.pdf [file jci-131-150175-s007.pdf]

Impaired Humoral and Cellular Immunity after SARS-CoV2 BNT162b2 (Tozinameran) Prime-Boost Vaccination in Kidney Transplant Recipients

Sattler et al.

Supplemental Figures 1-5

Supplemental Figure 1, Sattler et al.

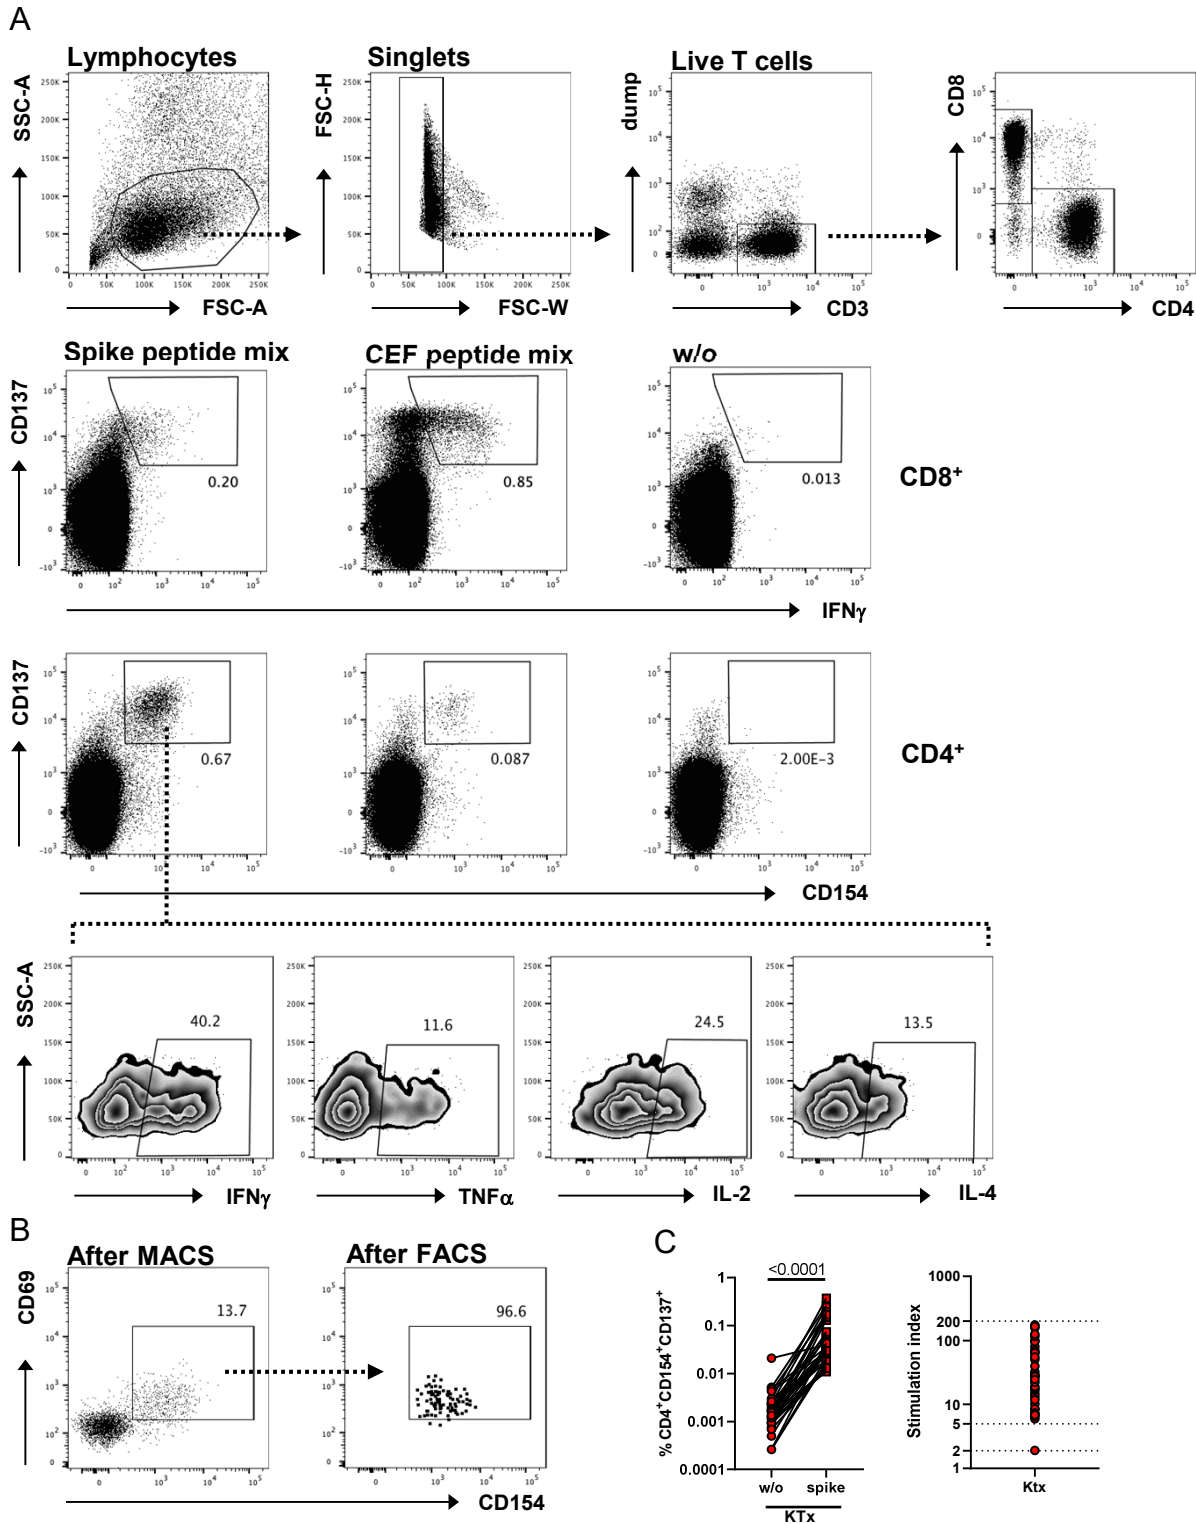

**Identification and enrichment of antigen-specific T cells.** (A) PBMC were stimulated or not with spike or CEF peptide mix for 16 h as indicated. Antigen-specific CD8<sup>+</sup> T cells were detected within live single CD14<sup>+</sup>CD19<sup>+</sup>CD3<sup>+</sup> (dump<sup>-</sup>) lymphocytes according to CD137 and IFN $\gamma$  co-expression. Live single CD14<sup>+</sup>CD19<sup>+</sup>CD3<sup>+</sup> specific CD4<sup>+</sup> Th cells were identified based on co-expression of CD154 and CD137. Specific CD4<sup>+</sup>CD154<sup>+</sup>CD137<sup>+</sup> Th cells were further analyzed for expression of IFN $\gamma$ , TNF $\alpha$ , IL-2 and/or IL-4. (B) Exemplary reanalysis dot plots depicting pre-enrichment of spike specific CD4<sup>+</sup> Th cells via MACS based on activation induced CD154 expression (left), followed by purification via FACS (right). (C) Frequencies of CD4<sup>+</sup>CD154<sup>+</sup>CD137<sup>+</sup> T cells in unstimulated vs. spike-stimulated samples from responding KTx patients with paired analysis (left) and corresponding stimulation indices (SI) with marks at the defined lower cut-off of 2 for a positive response and at 5 and 200 highlighting the SI range of all but one patient (right); if the percentage in the unstimulated control was 0, the minimum value within the patient cohort was used instead. n as in Fig. 2B.

Supplemental Figure 2, Sattler et al.

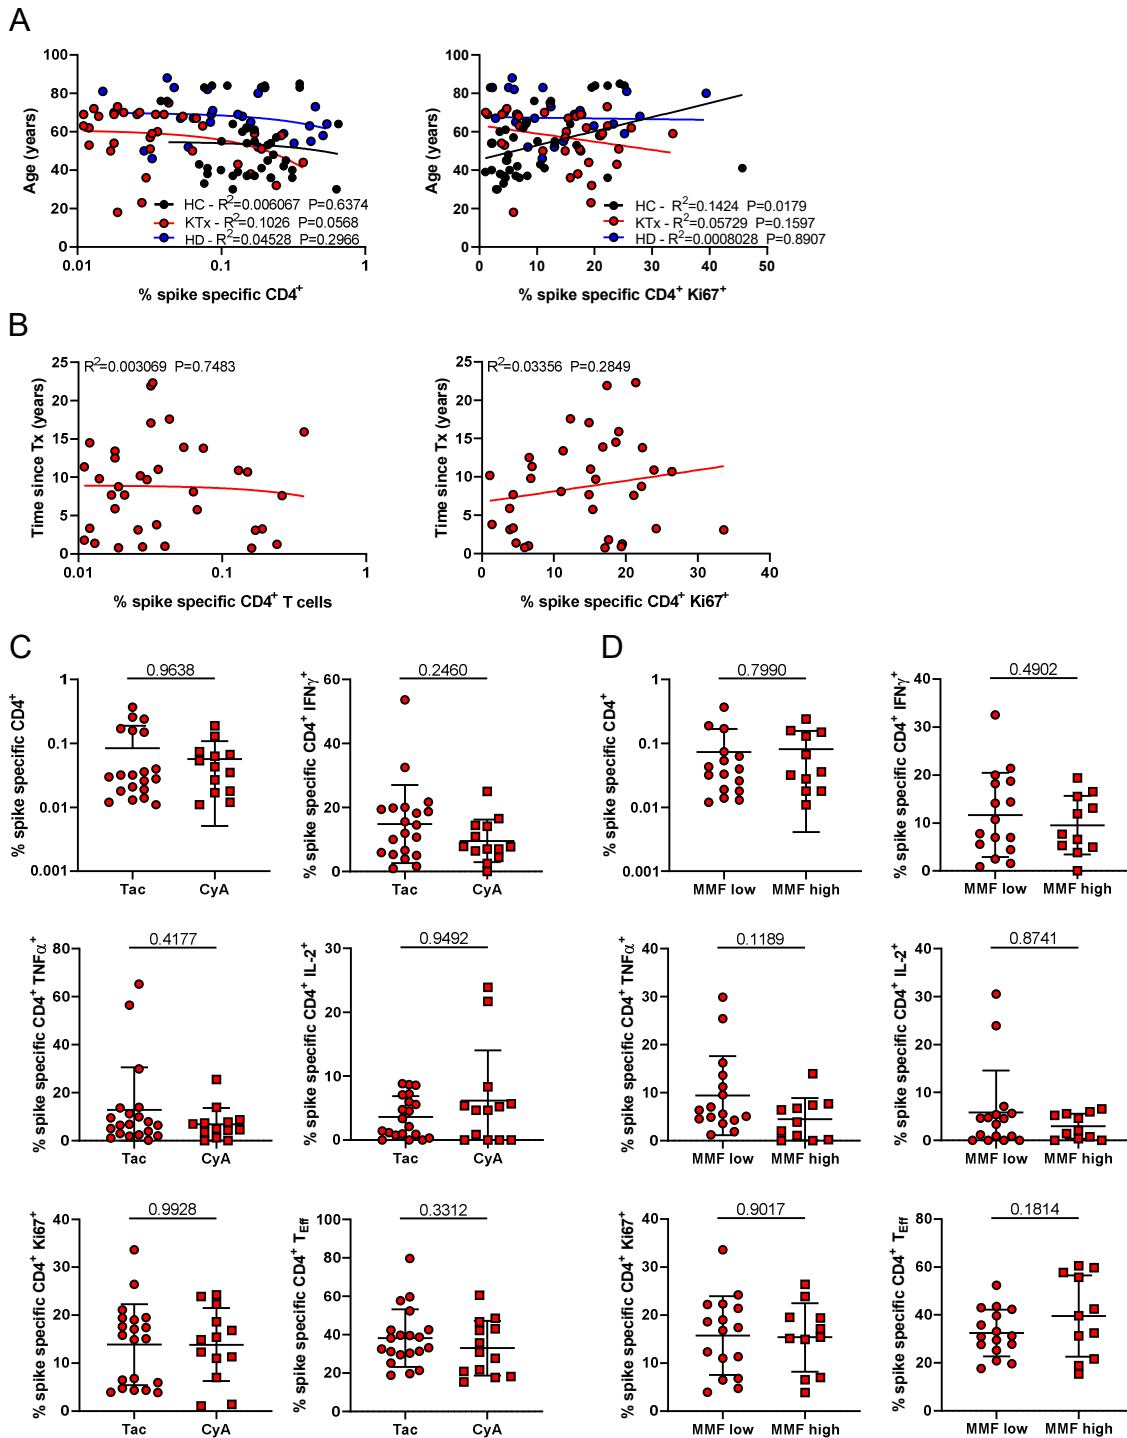

**Association of the vaccine specific CD4<sup>+</sup> T cell response with age and IS medication.** (A) Age of HC, KTx and HD patients was correlated with frequencies of spike-specific CD4<sup>+</sup> Th cells (left) or frequencies of proliferating Ki67<sup>+</sup> cells within the antigen-specific Th cell population (right) with n as in Fig. 2B. (B) Correlation of time since transplantation with frequencies of spike-specific CD4<sup>+</sup> Th cells (left) or frequencies of proliferating Ki67<sup>+</sup> cells within the antigen-specific Th cell population (right) in KTx patients with n as in Fig. 2B. (C and D) KTx patients were stratified according to immunosuppressive drug regimen. Frequencies of spike specific Th cells or those expressing IFN $\gamma$ , TNF $\alpha$ , IL-2, Ki67 or showing a CD45RO<sup>+</sup>CD62L<sup>-</sup> T<sub>Erf</sub> phenotype were compared in patients receiving Tacrolimus or Cyclosporine A based (C) or low vs. high MMF therapy (D) (Tac: n=20, CyA: n=13, respectively). Graphs show mean  $\pm$  SD.

Supplemental Figure 3, Sattler et al.

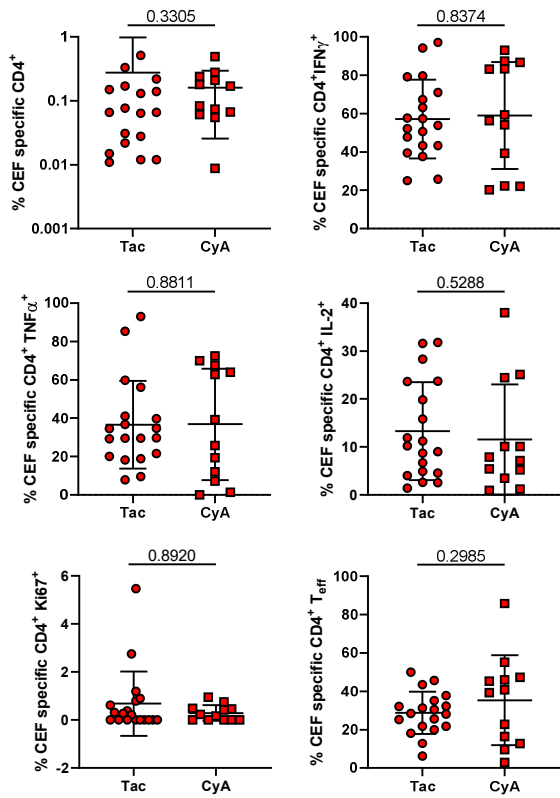

**Association of CEF-specific CD4<sup>+</sup> T cell responses with IS medication.** KTx patients were stratified according to immunosuppressive drug regimen. Frequencies of CEF specific Th cells or those expressing IFN $\gamma$ , TNF $\alpha$ , IL-2, Ki67 or showing a CD45RO<sup>+</sup>CD62L<sup>-</sup> T<sub>eff</sub> phenotype were compared in patients receiving Tacrolimus or Cyclosporine A based therapy (Tac: n=19, CyA: n=12, respectively). Graphs show mean  $\pm$  SD.

## Supplemental Figure 4, Sattler et al.

A

| NAME                                       | SIZE | ES          | NES         | NOM p-val   | FDR q-val   | FWER p-val | RANK AT MAX                         | LEADING EDGE |
|--------------------------------------------|------|-------------|-------------|-------------|-------------|------------|-------------------------------------|--------------|
| HALLMARK_UV_RESPONSE_UP                    | 128  | -0,5641754  | -2,1331058  | 0           | 1,74E-04    | 1,00E-04   | 2415 tags=37%, list=15%, signal=43% |              |
| HALLMARK_INFLAMMATORY_RESPONSE             | 130  | -0,53510743 | -2,0387063  | 0           | 3,49E-04    | 4,00E-04   | 3152 tags=42%, list=20%, signal=51% |              |
| HALLMARK_IL2_STATS_SIGNALING               | 173  | -0,51259583 | -2,0187755  | 0           | 2,33E-04    | 4,00E-04   | 2829 tags=42%, list=18%, signal=50% |              |
| HALLMARK_HYPOXIA                           | 154  | -0,5184372  | -2,0026288  | 0           | 2,13E-04    | 5,00E-04   | 2504 tags=38%, list=16%, signal=45% |              |
| HALLMARK_MTORC1_SIGNALING                  | 193  | -0,49838114 | -1,9945359  | 0           | 2,04E-04    | 6,00E-04   | 2922 tags=36%, list=18%, signal=44% |              |
| HALLMARK_ALLOGRAFT_REJECTION               | 155  | -0,5003024  | -1,9453664  | 0           | 3,54E-04    | 0,0012     | 2184 tags=26%, list=14%, signal=30% |              |
| HALLMARK_GLYCOLYSIS                        | 155  | -0,49042752 | -1,9036313  | 0           | 5,27E-04    | 0,0021     | 3428 tags=41%, list=22%, signal=51% |              |
| HALLMARK_IL6_JAK_STAT3_SIGNALING           | 63   | -0,53159034 | -1,7956237  | 2,15E-04    | 0,002151928 | 0,0096     | 1727 tags=33%, list=11%, signal=37% |              |
| HALLMARK_KRAS_SIGNALING_DN                 | 75   | -0,5130576  | -1,7953149  | 6,46E-04    | 0,001929919 | 0,0097     | 1002 tags=20%, list=6%, signal=21%  |              |
| HALLMARK_TNFA_SIGNALING_VIA_NFKB           | 169  | -0,4499193  | -1,770671   | 2,24E-04    | 0,002578845 | 0,0142     | 2525 tags=33%, list=16%, signal=38% |              |
| HALLMARK_MYC_TARGETS_V2                    | 58   | -0,4802872  | -1,6108648  | 0,005877231 | 0,014407734 | 0,084      | 2769 tags=34%, list=17%, signal=42% |              |
| HALLMARK_REACTIVE_OXYGEN_SPECIES_PATHWAY   | 46   | -0,49912915 | -1,5893345  | 0,013463627 | 0,016247097 | 0,1021     | 3159 tags=39%, list=20%, signal=49% |              |
| HALLMARK_INTERFERON_GAMMA_RESPONSE         | 176  | -0,3968431  | -1,5691535  | 6,83E-04    | 0,01840697  | 0,1236     | 3221 tags=30%, list=20%, signal=37% |              |
| HALLMARK_ADIPOGENESIS                      | 165  | -0,39565256 | -1,5510837  | 0,001363017 | 0,02058476  | 0,1473     | 1928 tags=23%, list=12%, signal=26% |              |
| HALLMARK_COAGULATION                       | 59   | -0,46534306 | -1,5489655  | 0,013098561 | 0,019737085 | 0,1509     | 1883 tags=29%, list=12%, signal=33% |              |
| HALLMARK_ESTROGEN_RESPONSE_LATE            | 126  | -0,40467334 | -1,531774   | 0,002889531 | 0,021827238 | 0,1759     | 2437 tags=31%, list=15%, signal=36% |              |
| HALLMARK_COMPLEMENT                        | 134  | -0,39254677 | -1,4974877  | 0,00447828  | 0,028232267 | 0,2339     | 2885 tags=30%, list=18%, signal=36% |              |
| HALLMARK_HEME_METABOLISM                   | 157  | -0,37600276 | -1,4624645  | 0,005859815 | 0,036552105 | 0,3058     | 2821 tags=30%, list=18%, signal=36% |              |
| HALLMARK_CHOLESTEROL_HOMEOSTASIS           | 66   | -0,4293268  | -1,4580432  | 0,026105717 | 0,036226396 | 0,317      | 2940 tags=32%, list=19%, signal=39% |              |
| HALLMARK_APICAL_JUNCTION                   | 119  | -0,38424537 | -1,4372096  | 0,010772404 | 0,04122356  | 0,3686     | 2884 tags=29%, list=18%, signal=36% |              |
| HALLMARK_MYOGENESIS                        | 105  | -0,38624853 | -1,421316   | 0,015333333 | 0,045172434 | 0,4122     | 2460 tags=25%, list=16%, signal=29% |              |
| HALLMARK_PI3K_AKT_MTOR_SIGNALING           | 94   | -0,3814115  | -1,3787745  | 0,034290805 | 0,06129168  | 0,5295     | 3289 tags=37%, list=21%, signal=47% |              |
| HALLMARK_ANDROGEN_RESPONSE                 | 84   | -0,38136986 | -1,3548361  | 0,043639537 | 0,071430475 | 0,6026     | 2829 tags=26%, list=18%, signal=32% |              |
| HALLMARK_APOPTOSIS                         | 135  | -0,34027776 | -1,2972382  | 0,048965055 | 0,10887173  | 0,7705     | 3078 tags=35%, list=19%, signal=43% |              |
| HALLMARK_SPERMATOGENESIS                   | 74   | -0,37096983 | -1,2909025  | 0,08660534  | 0,1097702   | 0,7865     | 3055 tags=27%, list=19%, signal=33% |              |
| HALLMARK_MYC_TARGETS_V1                    | 200  | -0,30730104 | -1,2327498  | 0,06382979  | 0,1641945   | 0,9099     | 3387 tags=29%, list=21%, signal=36% |              |
| HALLMARK_ESTROGEN_RESPONSE_EARLY           | 132  | -0,3216158  | -1,2223709  | 0,092887595 | 0,17019427  | 0,927      | 2914 tags=30%, list=18%, signal=36% |              |
| HALLMARK_XENOBIOTIC_METABOLISM             | 121  | -0,31138954 | -1,1705942  | 0,15408456  | 0,23529126  | 0,976      | 2348 tags=25%, list=15%, signal=29% |              |
| HALLMARK_P53_PATHWAY                       | 169  | -0,28477034 | -1,1138054  | 0,20823902  | 0,32681426  | 0,996      | 1719 tags=17%, list=11%, signal=18% |              |
| HALLMARK_KRAS_SIGNALING_UP                 | 116  | -0,2912415  | -1,0899824  | 0,2715217   | 0,36367878  | 0,9979     | 1949 tags=20%, list=12%, signal=22% |              |
| HALLMARK_UNFOLDED_PROTEIN_RESPONSE         | 111  | -0,28320986 | -1,0562775  | 0,3199912   | 0,42700946  | 0,9996     | 2618 tags=22%, list=17%, signal=26% |              |
| HALLMARK_G2M_CHECKPOINT                    | 187  | -0,26357728 | -1,0458515  | 0,3312442   | 0,43807837  | 0,9997     | 3374 tags=27%, list=21%, signal=34% |              |
| HALLMARK_E2F_TARGETS                       | 192  | -0,24550505 | -0,977073   | 0,5110102   | 0,60369354  | 1          | 3311 tags=27%, list=21%, signal=33% |              |
| HALLMARK_ANGIOGENESIS                      | 15   | -0,38621876 | -0,9644302  | 0,50950414  | 0,6214266   | 1          | 1921 tags=27%, list=12%, signal=30% |              |
| HALLMARK_INTERFERON_ALPHA_RESPONSE         | 93   | -0,25187108 | -0,9093883  | 0,6471905   | 0,76174366  | 1          | 397 tags=4%, list=3%, signal=4%     |              |
| HALLMARK_EPITHELIAL_MESENCHYMAL_TRANSITION | 94   | -0,24942395 | -0,90142405 | 0,67144114  | 0,7628438   | 1          | 2526 tags=20%, list=16%, signal=24% |              |
| HALLMARK_PEROXISOME                        | 81   | -0,25073645 | -0,88513416 | 0,7019462   | 0,78545314  | 1          | 2880 tags=23%, list=18%, signal=29% |              |
| HALLMARK_WNT_BETA_CATENIN_SIGNALING        | 33   | -0,29142243 | -0,86507404 | 0,6753191   | 0,8135227   | 1          | 4172 tags=39%, list=26%, signal=53% |              |
| HALLMARK_NOTCH_SIGNALING                   | 23   | -0,30740926 | -0,84920996 | 0,68510276  | 0,8279177   | 1          | 1711 tags=17%, list=11%, signal=19% |              |
| HALLMARK_APICAL_SURFACE                    | 23   | -0,3014496  | -0,828369   | 0,7181818   | 0,8480437   | 1          | 4367 tags=35%, list=28%, signal=48% |              |

B

| NAME                               | SIZE | ES         | NES        | NOM p-val  | FDR q-val  | FWER p-val | RANK AT MAX                         | LEADING EDGE |
|------------------------------------|------|------------|------------|------------|------------|------------|-------------------------------------|--------------|
| HALLMARK_UV_RESPONSE_DN            | 97   | 0,42865124 | 1,5239751  | 0,00582878 | 0,07493693 | 0,2038     | 2270 tags=24%, list=14%, signal=28% |              |
| HALLMARK_BILE_ACID_METABOLISM      | 71   | 0,35608056 | 1,2131244  | 0,14803958 | 0,5646358  | 0,9715     | 1132 tags=15%, list=7%, signal=17%  |              |
| HALLMARK_TGF_BETA_SIGNALING        | 47   | 0,3707881  | 1,1713269  | 0,2067803  | 0,50112796 | 0,9919     | 1416 tags=19%, list=9%, signal=21%  |              |
| HALLMARK_OXIDATIVE_PHOSPHORYLATION | 198  | 0,26288894 | 1,0292147  | 0,3792065  | 0,8755382  | 0,9999     | 2654 tags=19%, list=17%, signal=23% |              |
| HALLMARK_FATTY_ACID_METABOLISM     | 126  | 0,25521058 | 0,9454126  | 0,5820029  | 1          | 1          | 2510 tags=20%, list=16%, signal=23% |              |
| HALLMARK_MITOTIC_SPINDLE           | 178  | 0,23568171 | 0,9080746  | 0,7056292  | 0,9987016  | 1          | 3859 tags=27%, list=24%, signal=35% |              |
| HALLMARK_PROTEIN_SECRETION         | 89   | 0,25184608 | 0,88440883 | 0,70160544 | 0,92864144 | 1          | 2126 tags=18%, list=13%, signal=21% |              |
| HALLMARK_DNA_REPAIR                | 144  | 0,23132612 | 0,8698067  | 0,7767025  | 0,85021406 | 1          | 2998 tags=22%, list=19%, signal=27% |              |
| HALLMARK_HEDGEHOG_SIGNALING        | 19   | 0,28498533 | 0,73240435 | 0,83780235 | 0,9576085  | 1          | 2234 tags=21%, list=14%, signal=24% |              |

**Gene set enrichment analysis result for genes sorted by differential expression p-value and direction of regulation in KTx vs. HC.** Enrichments for genes (A) down- or (B) upregulated in KTx vs. healthy individuals are shown. ES: enrichment score, NES: normalized enrichment score, NOM p -val: raw p-value, FDR: false discovery rate, FWER: family-wise error rate.

## Supplemental Figure 5, Sattler et al.

A

| NAME                                     | SIZE | ES          | NES         | NOM p-val   | FDR q-val   | FWER p-val | RANK AT MAX                         | LEADING EDGE |
|------------------------------------------|------|-------------|-------------|-------------|-------------|------------|-------------------------------------|--------------|
| HALLMARK_GLYCOLYSIS                      | 138  | -0,48345116 | -1,8287017  | 0           | 0,007433969 | 0,0054     | 1576 tags=28%, list=13%, signal=31% |              |
| HALLMARK_UV_RESPONSE_UP                  | 115  | -0,47041073 | -1,7274398  | 1,88E-04    | 0,017351985 | 0,0245     | 2675 tags=45%, list=23%, signal=58% |              |
| HALLMARK_MTORC1_SIGNALING                | 187  | -0,42718133 | -1,6798857  | 0           | 0,020352745 | 0,0433     | 1981 tags=27%, list=17%, signal=32% |              |
| HALLMARK_XENOBIOTIC_METABOLISM           | 108  | -0,45810518 | -1,6656884  | 1,89E-04    | 0,017777689 | 0,0497     | 1984 tags=32%, list=17%, signal=39% |              |
| HALLMARK_MYC_TARGETS_V2                  | 57   | -0,49633196 | -1,6382238  | 0,005408538 | 0,019057767 | 0,0663     | 3305 tags=58%, list=28%, signal=80% |              |
| HALLMARK_APICAL_SURFACE                  | 20   | -0,6067829  | -1,6073259  | 0,019530479 | 0,022692421 | 0,0939     | 1573 tags=30%, list=13%, signal=35% |              |
| HALLMARK_WNT_BETA_CATENIN_SIGNALING      | 28   | -0,55339086 | -1,57638    | 0,017605634 | 0,02668883  | 0,1264     | 2715 tags=43%, list=23%, signal=56% |              |
| HALLMARK_MYOGENESIS                      | 71   | -0,44039714 | -1,5007114  | 0,015748031 | 0,04948565  | 0,2501     | 2166 tags=35%, list=18%, signal=43% |              |
| HALLMARK_DNA_REPAIR                      | 143  | -0,38873306 | -1,4767677  | 0,006228766 | 0,05560669  | 0,3049     | 1621 tags=22%, list=14%, signal=26% |              |
| HALLMARK_ESTROGEN_RESPONSE_LATE          | 114  | -0,3943081  | -1,4511386  | 0,010638298 | 0,06404827  | 0,3726     | 2018 tags=29%, list=17%, signal=35% |              |
| HALLMARK_UNFOLDED_PROTEIN_RESPONSE       | 108  | -0,37865734 | -1,3821554  | 0,027573181 | 0,10618592  | 0,574      | 1587 tags=20%, list=14%, signal=23% |              |
| HALLMARK_ADIPOGENESIS                    | 155  | -0,35083774 | -1,3407478  | 0,02631579  | 0,13674612  | 0,6992     | 1896 tags=27%, list=16%, signal=32% |              |
| HALLMARK_ALLOGRAFT_REJECTION             | 148  | -0,33960602 | -1,29957    | 0,04447795  | 0,1753115   | 0,8118     | 1390 tags=20%, list=12%, signal=22% |              |
| HALLMARK_HYPOXIA                         | 131  | -0,3428638  | -1,2901081  | 0,052820902 | 0,17509621  | 0,8347     | 1968 tags=27%, list=17%, signal=33% |              |
| HALLMARK_CHOLESTEROL_HOMEOSTASIS         | 62   | -0,38684174 | -1,2877407  | 0,10009681  | 0,16603923  | 0,8396     | 1864 tags=26%, list=16%, signal=31% |              |
| HALLMARK_PEROXISOME                      | 78   | -0,36796567 | -1,2771143  | 0,09290445  | 0,16886579  | 0,8641     | 1229 tags=17%, list=10%, signal=18% |              |
| HALLMARK_PI3K_AKT_MTOR_SIGNALING         | 91   | -0,356438   | -1,2645499  | 0,09163196  | 0,17515218  | 0,8885     | 2104 tags=27%, list=18%, signal=33% |              |
| HALLMARK_TNFA_SIGNALING_VIA_NFKB         | 160  | -0,32696941 | -1,2596805  | 0,060977913 | 0,17198606  | 0,8984     | 2895 tags=38%, list=25%, signal=49% |              |
| HALLMARK_IL2_STAT5_SIGNALING             | 164  | -0,32278168 | -1,2454358  | 0,066753685 | 0,18032515  | 0,9216     | 1478 tags=19%, list=13%, signal=21% |              |
| HALLMARK_FATTY_ACID_METABOLISM           | 121  | -0,33270532 | -1,2335275  | 0,09382065  | 0,18653947  | 0,9352     | 2493 tags=26%, list=21%, signal=33% |              |
| HALLMARK_KRAS_SIGNALING_DN               | 55   | -0,35172927 | -1,1464943  | 0,22848894  | 0,32001868  | 0,9943     | 2717 tags=38%, list=23%, signal=49% |              |
| HALLMARK_REACTIVE_OXYGEN_SPECIES_PATHWAY | 41   | -0,36580947 | -1,1314687  | 0,26830202  | 0,33564013  | 0,9969     | 2839 tags=37%, list=24%, signal=48% |              |
| HALLMARK_INFLAMMATORY_RESPONSE           | 121  | -0,28651872 | -1,0637712  | 0,31603774  | 0,4764479   | 0,9999     | 1561 tags=16%, list=13%, signal=18% |              |
| HALLMARK_ESTROGEN_RESPONSE_EARLY         | 113  | -0,2890921  | -1,0604345  | 0,3254371   | 0,46507168  | 0,9999     | 1992 tags=27%, list=17%, signal=32% |              |
| HALLMARK_APICAL_JUNCTION                 | 93   | -0,28925905 | -1,0374317  | 0,3748053   | 0,5045558   | 0,9999     | 2443 tags=28%, list=21%, signal=35% |              |
| HALLMARK_APOPTOSIS                       | 129  | -0,27663374 | -1,0339795  | 0,37471783  | 0,49388325  | 0,9999     | 2962 tags=36%, list=25%, signal=48% |              |
| HALLMARK_HEME_METABOLISM                 | 143  | -0,26331586 | -0,9976748  | 0,45519096  | 0,5696921   | 1          | 2275 tags=26%, list=19%, signal=32% |              |
| HALLMARK_P53_PATHWAY                     | 161  | -0,2509777  | -0,9701577  | 0,5198954   | 0,6242107   | 1          | 1233 tags=16%, list=11%, signal=17% |              |
| HALLMARK_NOTCH_SIGNALING                 | 19   | -0,35768104 | -0,9342219  | 0,5431927   | 0,70242625  | 1          | 2533 tags=42%, list=22%, signal=54% |              |
| HALLMARK_OXIDATIVE_PHOSPHORYLATION       | 197  | -0,23607048 | -0,93288046 | 0,64928734  | 0,6828343   | 1          | 1730 tags=19%, list=15%, signal=22% |              |
| HALLMARK_COMPLEMENT                      | 121  | -0,22164218 | -0,8193923  | 0,87114954  | 0,93663484  | 1          | 2094 tags=22%, list=18%, signal=27% |              |
| HALLMARK_MYC_TARGETS_V1                  | 200  | -0,20483164 | -0,81089294 | 0,9442849   | 0,9229208   | 1          | 1244 tags=12%, list=11%, signal=13% |              |
| HALLMARK_SPERMATOGENESIS                 | 58   | -0,2102307  | -0,6947868  | 0,9622715   | 1           | 1          | 2638 tags=26%, list=22%, signal=33% |              |
| HALLMARK_COAGULATION                     | 46   | -0,21791056 | -0,6867504  | 0,94808745  | 0,97978604  | 1          | 2094 tags=22%, list=18%, signal=26% |              |

B

| NAME                                       | SIZE | ES         | NES        | NOM p-val   | FDR q-val   | FWER p-val | RANK AT MAX                         | LEADING EDGE |
|--------------------------------------------|------|------------|------------|-------------|-------------|------------|-------------------------------------|--------------|
| HALLMARK_MITOTIC_SPINDLE                   | 159  | 0,44528213 | 1,737718   | 0           | 0,010422074 | 0,0179     | 1598 tags=23%, list=14%, signal=27% |              |
| HALLMARK_UV_RESPONSE_DN                    | 87   | 0,39546713 | 1,4120328  | 0,029046517 | 0,16643237  | 0,437      | 2316 tags=32%, list=20%, signal=40% |              |
| HALLMARK_PROTEIN_SECRETION                 | 88   | 0,36356315 | 1,3011699  | 0,07064429  | 0,27900046  | 0,7696     | 1707 tags=24%, list=15%, signal=28% |              |
| HALLMARK_KRAS_SIGNALING_UP                 | 99   | 0,34570763 | 1,2596259  | 0,08398727  | 0,28699598  | 0,8692     | 1845 tags=21%, list=16%, signal=25% |              |
| HALLMARK_E2F_TARGETS                       | 182  | 0,30002373 | 1,1899107  | 0,0957782   | 0,3790868   | 0,969      | 2486 tags=27%, list=21%, signal=34% |              |
| HALLMARK_G2M_CHECKPOINT                    | 169  | 0,26614198 | 1,0466211  | 0,3258595   | 0,75955534  | 0,9997     | 2645 tags=27%, list=23%, signal=35% |              |
| HALLMARK_ANDROGEN_RESPONSE                 | 78   | 0,29347807 | 1,0280854  | 0,39508787  | 0,71913296  | 0,9999     | 2284 tags=28%, list=19%, signal=35% |              |
| HALLMARK_EPITHELIAL_MESENCHYMAL_TRANSITION | 70   | 0,288305   | 0,98897487 | 0,47003156  | 0,7650182   | 1          | 373 tags=9%, list=3%, signal=9%     |              |
| HALLMARK_TGF_BETA_SIGNALING                | 42   | 0,3073257  | 0,9582165  | 0,521757    | 0,78557426  | 1          | 1187 tags=17%, list=10%, signal=18% |              |
| HALLMARK_IL6_JAK_STAT3_SIGNALING           | 59   | 0,28399596 | 0,95088637 | 0,53798383  | 0,7305782   | 1          | 1103 tags=14%, list=9%, signal=15%  |              |
| HALLMARK_INTERFERON_ALPHA_RESPONSE         | 92   | 0,25108352 | 0,9030983  | 0,6659677   | 0,8030188   | 1          | 3298 tags=37%, list=28%, signal=51% |              |
| HALLMARK_INTERFERON_GAMMA_RESPONSE         | 171  | 0,2293831  | 0,9016661  | 0,73079354  | 0,73971325  | 1          | 2977 tags=32%, list=25%, signal=42% |              |
| HALLMARK_BILE_ACID_METABOLISM              | 61   | 0,24797216 | 0,83061695 | 0,79502714  | 0,83938235  | 1          | 1115 tags=13%, list=10%, signal=14% |              |

**Gene set enrichment analysis result for genes sorted by differential expression p-value and direction of regulation in HD vs HC.** Enrichments for genes (A) down- or (B) upregulated in HD vs. healthy individuals are shown. ES: enrichment score, NES: normalized enrichment score, NOM p -val: raw p-value, FDR: false discovery rate, FWER: family-wise error rate.
